# Supplementary material for: Targeting tumor hypoxia: a third generation 2-nitroimidazole-indocyanine dye-conjugate with improved fluorescent yield
Source: Royal Society of Chemistry journal article supplement (doi:10.1039/c5ob01460c), 2015-01-01
Supplement: c5ob01460c1.pdf [file c5ob01460c1.pdf]

## Supplemental Information

### Targeting Tumor Hypoxia: A Third Generation 2-Nitroimidazole–Indocyanine Dye–Conjugate with Improved Fluorescent Yield

Feifei Zhou,<sup>1a</sup> Saeid Zanganeh,<sup>1a</sup> Innus Mohammad,<sup>2a</sup> Christopher Dietz,<sup>2a</sup> Akram Abuteen,<sup>1</sup> Michael B. Smith,<sup>\*2</sup> Quing Zhu<sup>\*1</sup>

<sup>1</sup>H NMR data for new compounds, **8** and **12**. Repeated efforts to obtain the <sup>13</sup>C NMR failed to give a spectrum. We observed this problem with dye conjugate **4**.<sup>18</sup> Although the dye (**2** and **8**) showed reasonable <sup>13</sup>C NMR spectra, **4** and **12** did not. We examined the possibility of aggregation, rotamers, relaxation time, and low concentration due to solubility issues. All of these issues can lead to poor <sup>13</sup>C NMR spectra. Attempts to obtain <sup>13</sup>C NMR spectra at 25 °C failed, and we heated the samples to 55 °C to promote deaggregation. We also explored different solvents, including CD<sub>3</sub>OD, (CD<sub>3</sub>)<sub>2</sub>CO, D<sub>2</sub>O. We examined extended delay (relaxation) times up to 10 to 15 sec, as well as long acquisition times (up to 12 hours). None of these experiments led to a <sup>13</sup>C NMR. We have attempted indirect C<sup>13</sup> experiments, including HSQC, HMBC, and CIGAR. The problem is likely due to low solubility of **4** and **12**, coupled with the low isotope percentage of <sup>13</sup>C relative to <sup>12</sup>C versus the high percentage of <sup>1</sup>H, but we do not have a definitive answer to this problem. No experiments have been successful, so only <sup>1</sup>H NMR data is provided.

Note that the spectra for compound **8** were previously reported in another publication: “Targeting Tumor Hypoxia with 2-Nitroimidazole-ICG Dye Conjugates” Yan Xu, Saeid Zanganeh, Innus Mohammad, Andres Aguirre, Tianheng Wang, Yi Yang, Michael Smith and Quing Zhu *J. Biomed. Optics*, **2013**, *18*(6), 066009-1-11.

We also provide the data for the solubility studies in Figure 7.

**<sup>1</sup>H NMR.** Sodium 4-[2-[(1*E*,3*E*,5*Z*)-7-[1,1-dimethyl-3-(4-sulfonatobutyl)indol-2-ylidene]penta-1,3-dienyl]-1,1-dimethylindol-3-ium-3-yl]butane-1-sulfonate, **8**.

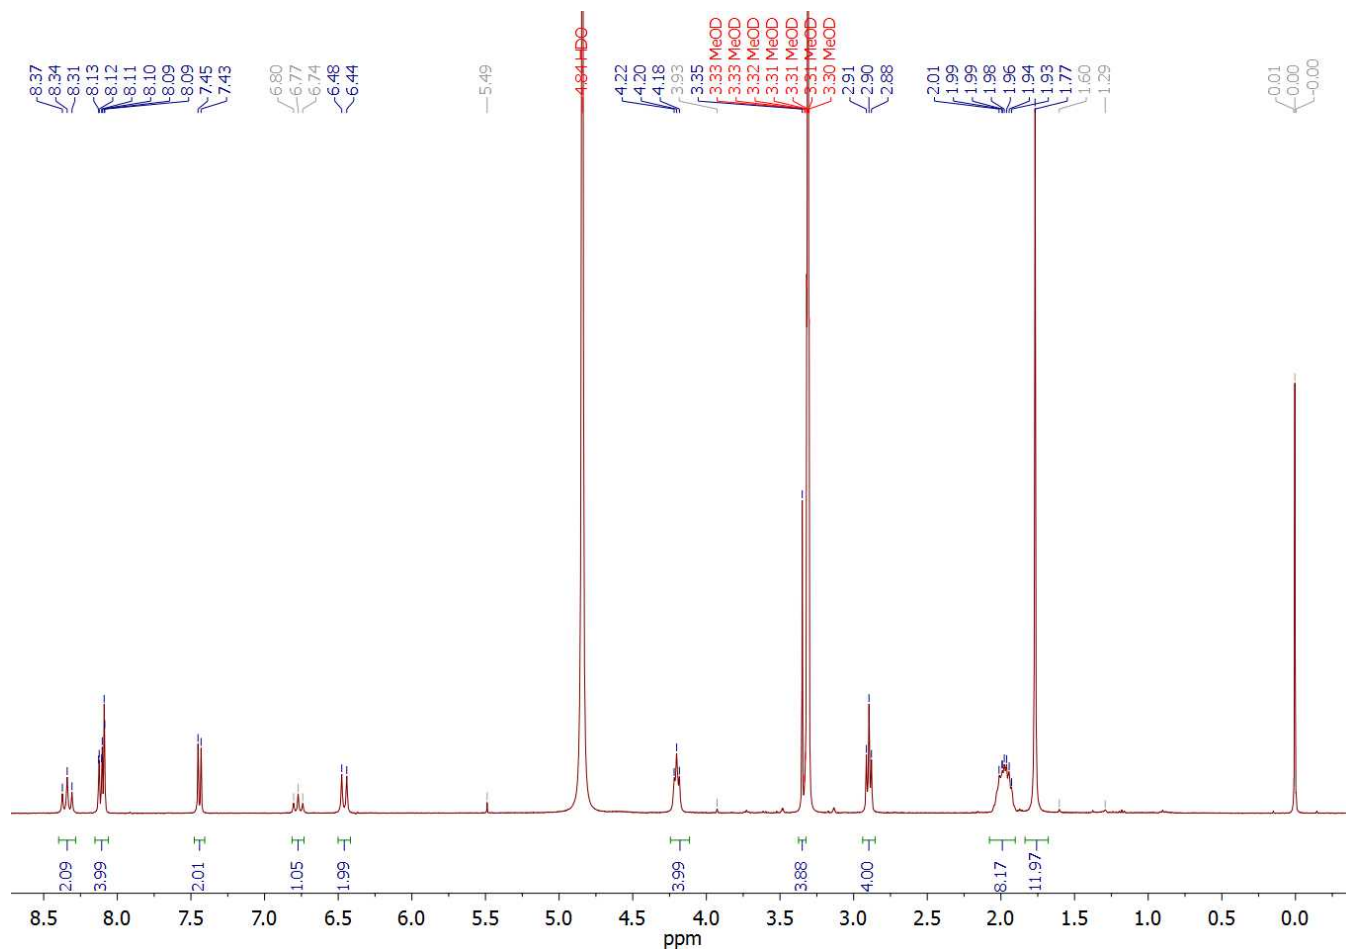

<sup>13</sup>C NMR. Sodium 4-[2-[(1*E*,3*E*,5*Z*)-7-[1,1-dimethyl-3-(4-sulfonatobutyl)indol-2-ylidene]penta-1,3-dienyl]-1,1-dimethylindol-3-ium-3-yl]butane-1-sulfonate, **8**.

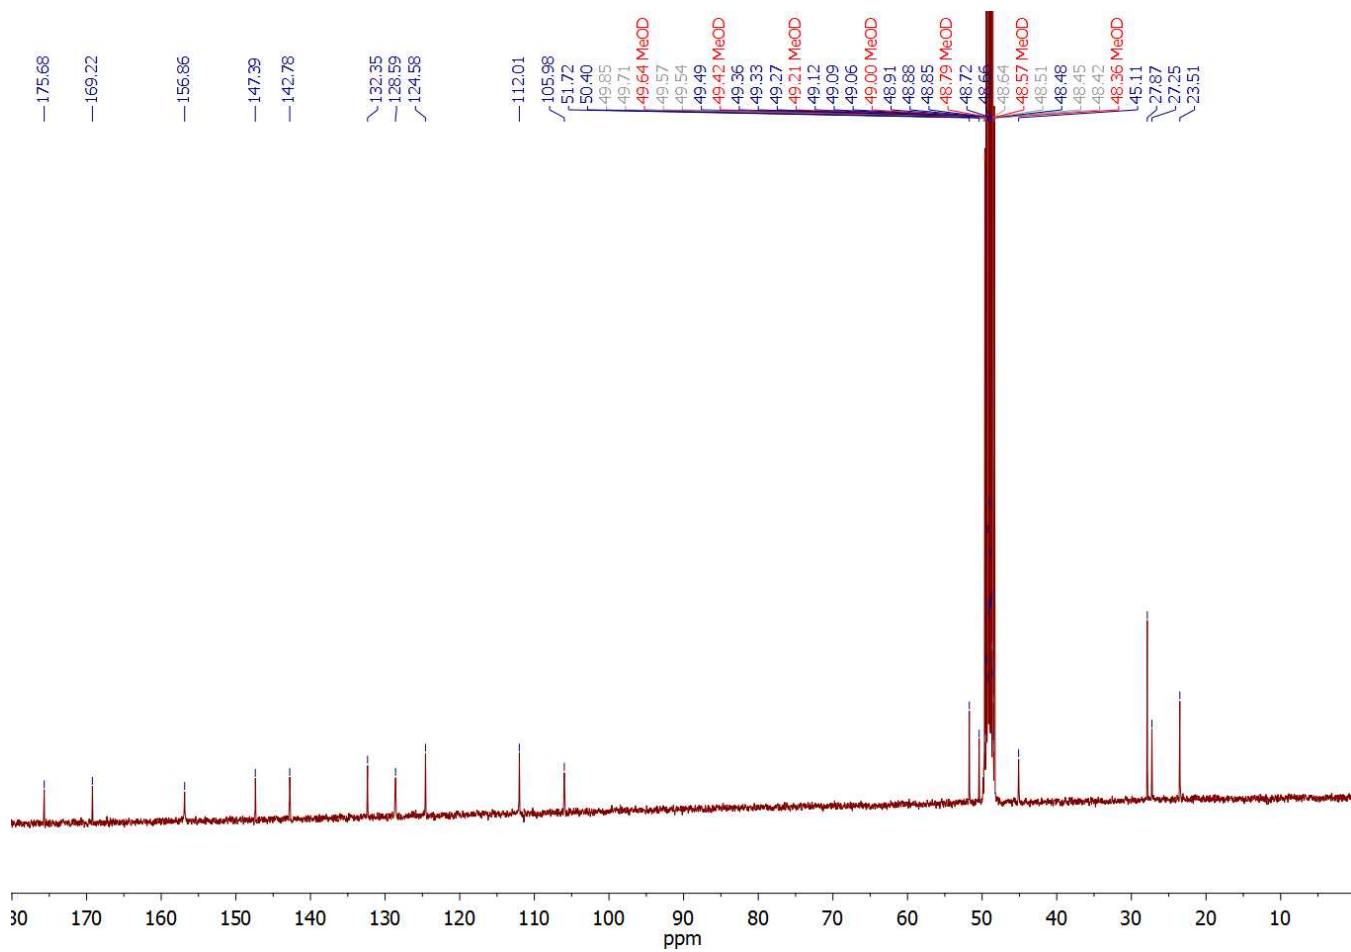

**<sup>1</sup>H NMR.** Sodium 4-((*Z*)-2-((*2E,4E*)-5-(3,3-dimethyl-5-(4-(2-(2-nitro-1*H*-imidazol-1-yl)acetyl)-piperazine-1-carbonyl)-1-(4-sulfonatobutyl)-3*H*-indol-1-ium-2-yl)penta-2,4-dien-1-ylidene)-3,3-dimethyl-5-(4-(2-(2-nitro-1*H*-imidazol-1-yl)acetyl)piperazine-1-carbonyl)indolin-1-yl)butane-1-sulfonate, **12**.

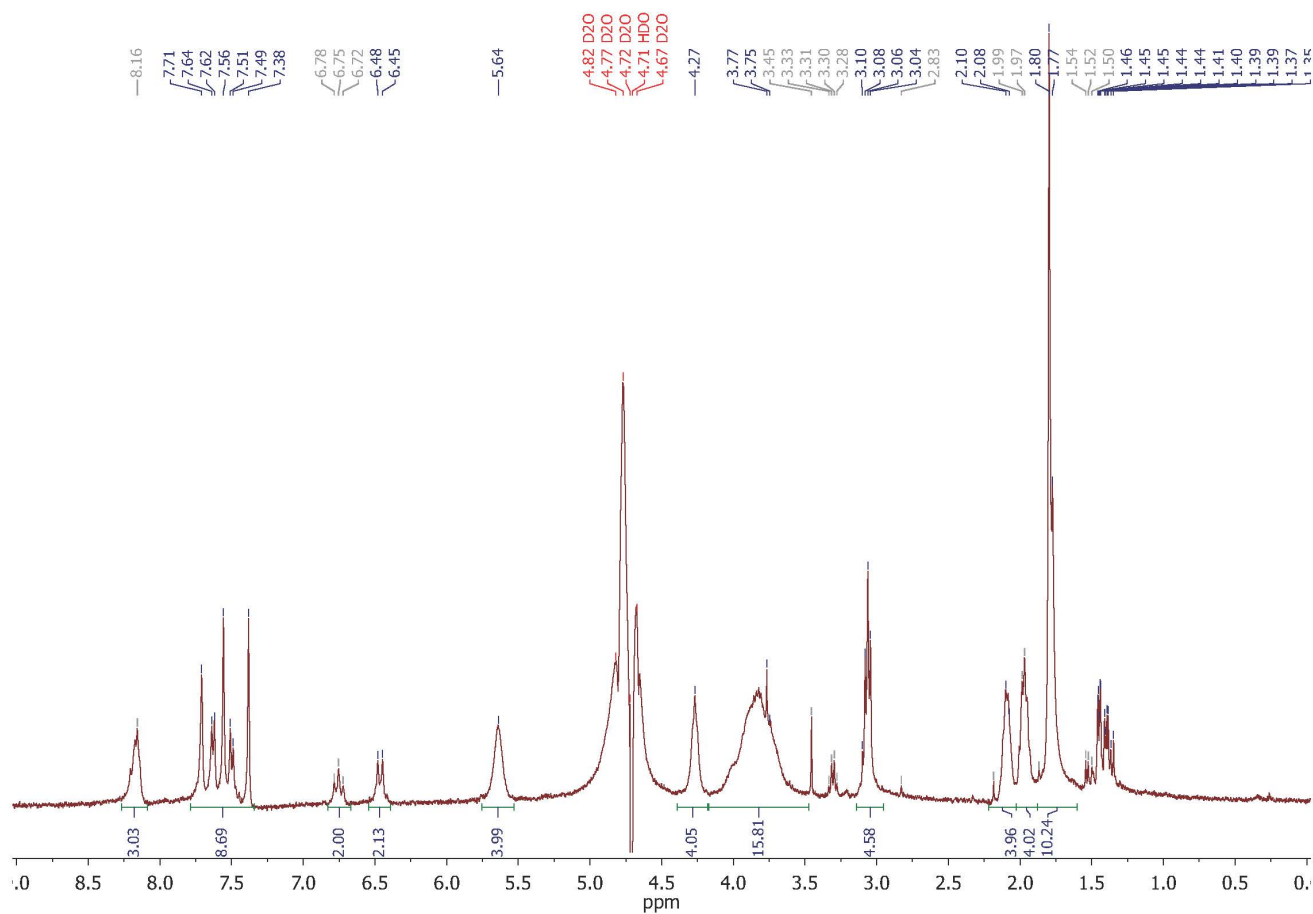

## Stability Studies

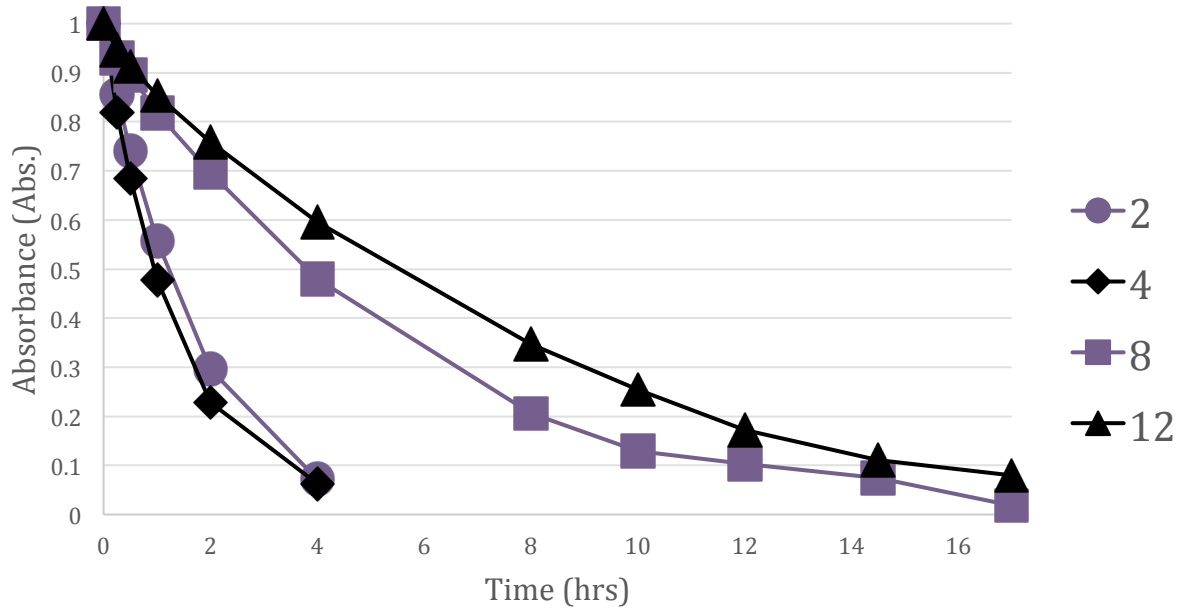

| Time (hrs) | Absorbance (Abs.) |
|------------|-------------------|------------|-------------------|------------|-------------------|------------|-------------------|
| 2          |                   | 4          |                   | 8          |                   | 12         |                   |
| 0          | 1.00              | 0          | 1.00              | 0          | 1.00              | 0          | 1.00              |
| 0.25       | 0.855             | 0.25       | 0.819             | 0.25       | 0.930             | 0.25       | 0.946             |
| 0.5        | 0.740             | 0.5        | 0.685             | 0.5        | 0.896             | 0.5        | 0.913             |
| 1          | 0.557             | 1          | 0.477             | 1          | 0.818             | 1          | 0.854             |
| 2          | 0.296             | 2          | 0.228             | 2          | 0.696             | 2          | 0.759             |
| 4          | 0.072             | 4          | 0.063             | 4          | 0.480             | 4          | 0.595             |
|            |                   |            |                   | 8          | 0.206             | 8          | 0.347             |
|            |                   |            |                   | 10         | 0.129             | 10         | 0.254             |
|            |                   |            |                   | 12         | 0.103             | 12         | 0.172             |
|            |                   |            |                   | 14.5       | 0.074             | 14.5       | 0.111             |
|            |                   |            |                   | 17         | 0.018             | 17         | 0.080             |
